# Supplementary material for: Investigation on Spectrum-Effect Correlation between Constituents Absorbed into Blood and Bioactivities of Baizhu Shaoyao San before and after Processing on Ulcerative Colitis Rats by UHPLC/Q-TOF-MS/MS Coupled with Gray Correlation Analysis
Source: MDPI journal article supplement (doi:10.3390/molecules24050940), 2019-03-07
Supplement: s1 [file s1]

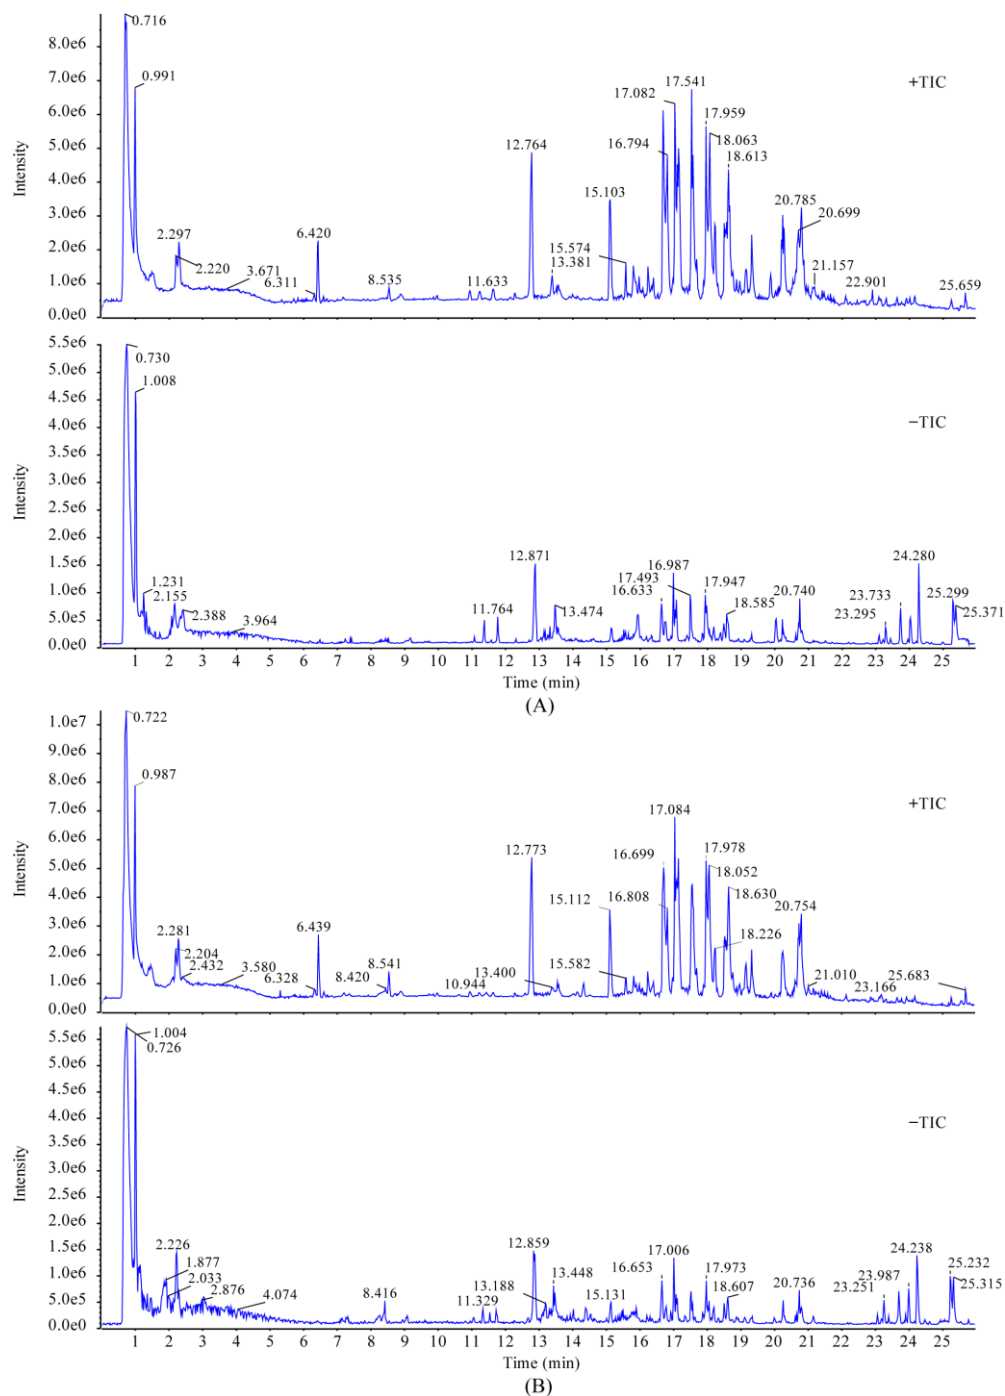

**Figure 1.** Typical total ion chromatograms (TICs) of constituents absorbed into blood of crude and processed BSS in both positive and negative ion modes. (A): crude BSS; (B): processed BSS.
